# Supplementary material for: Knowledge, Attitudes, and Beliefs Toward Organ Donation Registration Among Asian Americans: Development and Pilot-testing of Educational Intervention Video
Source: PubMed Central journal article supplement — Transplant Direct. 2024 Aug 8;10(9):e1693. doi: 10.1097/TXD.0000000000001693 (PMC11315553; doi:10.1097/txd.0000000000001693), 2024-08-08
Supplement: txd-10-e1693-s001.pdf [file txd-10-e1693-s001.pdf]

**Table S1.** Phase one survey

**Demographics**

First, we would like to start by asking a few questions about you.

Are you a...?

Male

Female

What year were you born?

▼ Prefer not to answer ... 1920

Were you born outside of United States?

Yes

No

Prefer not to answer

Where were you born?

China

Korea

Other, please specify \_\_\_\_\_

How many years have you been living in the United States?

How would you describe your race? Are you ...? (Please check all that apply)

- Asian
- Black or African American
- American Indian or Alaska Native
- Native Hawaiian or Pacific Islander
- White
- Other, please specify \_\_\_\_\_
- Uncertain

Are you ...?

- Chinese
- Korean
- Other, please specify \_\_\_\_\_

**Organ Donor Status**

Now, we would like to ask you some questions about your organ donation registration status and beliefs.

Have you ever donated blood?

Yes

No

Are you a registered organ donor?

Yes

No

In what year did you register?

▼ 2019 ... Don't remember

How did you register?

Driver's license

IDNYC card

Voter registration

Online, please specify website

Other, please specify \_\_\_\_\_

Please indicate which of the following statements best describes how willing you are to register as an organ donor.

- I have no interest in registering as an organ donor.
- I am considering registering to donate my organs after I pass away but want to think about it more.
- I am considering registering to donate my organs after I pass away but want to speak with my family first.
- I am considering registering to donate my organs after I pass away but need more information.
- I am willing to register right now to donate my organs after I pass away.
- Other, please specify \_\_\_\_\_

Please tell us if you strongly agree, agree, disagree, or strongly disagree with each of the following statement.

1. Registering to be an organ donor would make me feel proud of myself.
2. Registering to be an organ donor will bring me bad luck.
3. Registering to donate organs makes one more respected and admired by family and friends.
4. Registering to donate organs makes me feel uncomfortable.
5. Registering to donate organs is a true and unselfish gift.

Have you ever discussed your wishes about organ donation with your family?

- Yes, I have discussed it with my family.
- I have thought of it, but have not had a chance.
- I have never thought of it, but maybe in the future (after this survey).
- No, I do not plan to discuss it with my family.
- Other, please specify \_\_\_\_\_

Have you ever donated an organ?

Yes

No

Which organ?

Kidney

Liver

To whom?

Immediate family (parents, spouse, children, siblings)

Relative

Friend

Other, please specify \_\_\_\_\_

Please answer Yes or No, do you know someone who is a:

- |                                         |
|-----------------------------------------|
| 1. Registered organ donor               |
| 2. Deceased donor                       |
| 3. Living donor                         |
| 4. Patient waiting for organ transplant |
| 5. Organ transplant recipient           |

## Knowledge

Now, we would like to ask you some questions about organ donation and transplantation. All organ donation questions are about organs donated after one has passed away. Do not consider blood donation and living donation when answering these questions.

Please tell us if you think each of following statement is True, False or Don't Know?

K1. You can save up to 8 lives by donating your organs after death.

K2. No one in the U.S. dies waiting for a transplant because of not receiving an organ in time.

K3. You can register to donate your organs when you get or renew your driver's license, and when you apply for a NYC identification card or go through the NY State Department of Health website.

K4. All major religions approve of organ donation.

K5. You cannot be an organ donor after the age of 60.

K6. You cannot donate your organs if you have high blood pressure or diabetes.

K7. Majority of people in New York think being an organ donor is a good thing and are registered organ donors.

K8. New York State has the lowest percentage of people who are registered as organ donors in the United States.

K9. Organs can be sold for money in the United States.

K10. Rich or famous people can receive organs before other people.

K11. The donor's family is not responsible for costs related to organ donation.

K12. Organ donation does not delay funeral arrangements.

## Attitudes

Now, we would like to ask you some questions about what you think about organ donation. There are no right or wrong answers.

Please answer whether you strongly agree, agree, disagree, or strongly disagree with each of following statement.

- A1. Organ donation is a charitable and noble act.
- A2. Organ donation benefits all of society.
- A3. Registering as an organ donor adds extra meaning to life.
- A4. Organ donation can help save lives and improve quality of life.
- A5. It is unnatural to prolong life by organ transplantation.
- A6. The body is from our parents, so to donate organs is against filial piety.
- A7. My family would object if I registered as an organ donor.
- A8. My family would respect my wish to donate my organs after I pass away.
- A9. Organ donation provides comfort to the bereaved families.
- A10. Medical teams that recover organs would not treat the deceased body in a dignified manner.
- A11. Medical teams would try just as hard to save my life whether or not I am a registered organ donor.
- A12. Organ donation leaves the body disfigured and incomplete.
- A13. It is important for the body to be remained complete and buried intact.
- A14. It is uncomfortable to think or talk about organ donation.
- A15. The thought of my body being cut up or taken apart after I'm gone makes me feel uneasy.
- A16. Donating a body part would enable part of myself to remain alive after I am gone.

## Social Distance

Please answer whether you strongly agree, agree, disagree, or strongly disagree with each of following statement.

I would donate my organs after I pass away if I knew they would go to ***an immediate family member***, such as my brother who needs an organ transplant to live.

I would donate my organs after I pass away if I knew they would go to ***a distant relative***, such as my great uncle who needs an organ transplant to live.

I would donate my organs after I pass away if I knew they would go to ***a friend*** who needs an organ transplant to live.

I would donate my organs after I pass away if I knew they would go to ***someone from my home country*** who needs an organ transplant to live.

I would donate my organs after I pass away if I knew they would go to ***anyone*** who needs an organ transplant to live.



## Religious Beliefs

We would like to ask you some questions about your religious and spiritual beliefs.

Please answer whether you strongly agree, agree, disagree, or strongly disagree with each of following statement.

R1. Religion is an important part of my life.

R2. God/spirituality is an important part of my life.

R3. Religious/spiritual beliefs are important to me when making decisions about family or children.

R4. Taking organs from a person who has just passed away will still cause him great pain and disturb his process of passing away.

R5. A person who wishes to donate organs after passing away is compassionate, and this will help giving him/her a better rebirth.

R6. Organ donation is an act of generosity, and the person's body and organs should be treated with respect when recovered.

R7. It is wrong to donate our organs because we should maintain our entire bodies, which our parents have given us.

R8. After a person passed away his/her spirits will watch over the descendants; therefore it would be very disrespectful to damage the body by donating organs.

R9. Our bodies are receptacles of ch'i (the elements of nature), and donating organs would disturb the balance of our ch'i.

R10. It is wrong to donate the organs of a person who has passed away, because the person will be incomplete.

## Acculturation

The following questions are about your background and behavior related to how you identify yourself culturally. On a scale of 1 to 4 with 1 being "not at all" and 4 being "to a great extent", please select the option that best describes you.

How well do you **speak** the language of -

- a. your Asian culture of origin?
- b. English

How well do you **understand** the language of -

- a. your Asian culture of origin?
- b. English?

How well do you **read and write** in the language of -

- a. your Asian culture of origin?
- b. English?

How often do you **listen to music** or **watch movies** or **read books** from

- a. your Asian culture of origin?
- b. American culture?

How much do you **practice the tradition** and **celebrate the holidays** of -

- a. your Asian culture of origin?
- b. American culture?

There are many different ways in which people think of themselves. Which one of the following most closely describes how you view yourself?

- I consider myself an Asian person (e.g., Chinese, Korean, etc.). Even though I live and work in America, I still view myself as an Asian person.
- I consider myself as an American. Even though I have an Asian background and characteristics, I still view myself as an American.
- I consider myself as an Asian-American, although deep down I always know I am an Asian.
- I consider myself as an Asian-American, although deep down, I view myself as an American first.
- I consider myself as an Asian-American. I have both Asian and American characteristics, and I view myself as a blend of both.

## **Altruistic Scale**

Please tell us if you strongly agree, agree, disagree, or strongly disagree with each of the following statements.

If I could save someone's life, I would do everything possible.

---

I am a person who cares a lot about other people.

I admire other people who give to others and ask for nothing in return.

I believe that the measure of a meaningful life is based on good deeds done to others.

### More Demographic Information

What is your marital status?

- Married
- Single never married
- Divorced/separated
- Widowed

What is the highest level of education you have?

- No formal education
- Less than high school
- High school graduate
- Some college, trade school or technical school
- Undergraduate degree
- Graduate degree (Master's degree, MD, PhD)

What is your employment status?

- Employed full time
- Employed part time
- Unemployed
- Homemaker
- Retired
- Student
- Disabled

What is your annual household income?

- \$0 - \$20,000
- \$20,001 - \$40,000
- \$40,001 - \$60,000
- \$60,001 - \$80,000
- > \$80,000
- Prefer not to answer

Would you like to share any comments with us about this topic or survey?

---

**Table S2.** Phase two survey  
**Demographics**

Are you a ...?

- Male
- Female
- Other, please specify \_\_\_\_\_
- Prefer not to say

How old are you?

\_\_\_\_\_

What is the highest level of education you have completed?

- Less than high school graduate
- High school graduate
- Some college/ trade/technical/vocational training
- College graduate
- Post-graduate professional degree

What is your current marital status?

- Single/never married
- Married
- Separated/Divorced
- Widowed
- Other, please specify \_\_\_\_\_

How would you describe your race? Are you ...? (Please check all that apply)

- Asian
- African American/Afro Caribbean/African/Black
- American Indian/Alaskan Native
- Pacific Islander
- White
- Other, please specify \_\_\_\_\_
- Uncertain

Are you...?

- Chinese
- Korean
- Other, please specify \_\_\_\_\_

**Organ Donor Status**

Are you a registered organ donor?

- Yes
- No
- Don't know



If you are not a registered organ donor, are you willing to register as organ donor?

- Yes, I am willing to register
- I am considering registering
- I am not willing to register

### **Knowledge Pre-video**

Please tell us if you think each of following statements is True or False or Don't know?

K1. You can save up to 8 lives by donating your organs after death.

K2. No one is ever too old to become an organ donor.

K3. Registering as an organ donor does not change the medical care you will receive.

K4. Most religion view organ donation as a noble act.

K5. You can register to donate your organs through the DMV, on your iphone health App, and online at DonateLife.net

Please click next and watch the short video that follows.

### **Post Video Assessment**

Did you learn anything new from the video?

- Yes
- No

If yes, what new knowledge have you learn from this video? (Please check all that apply)

- Desperate need of organ for transplantation
- Importance of communication with family about organ donation
- Organ transplantation helps save life and improves quality of life of patient and family
- Other, please specify \_\_\_\_\_

## Knowledge Post-video

Please tell us if you think each of following statements is True or False or Don't know?

K1. You can save up to 8 lives by donating your organs after death.

K2. No one is ever too old to become an organ donor.

K3. Registering as an organ donor does not change the medical care you will receive.

K4. Most religion view organ donation as a noble act.

K5. You can register to donate your organs through the DMV, on your iphone health App, and online at DonateLife.net

If you have not already registered as an organ donor, do you think that the information you learned today will help inform your decision about organ donation registration in the future?

- Yes
- No
- Don't know
- Not applicable, I am a registered donor

After watching this video, do you intend to register as organ donor if you are not already a registered donor?

- Yes
- No
- Not applicable, I am a registered donor

Have you ever discussed organ donation with your family?

- Yes
- No

If not, after viewing the video, do you plan to talk to your family about your wishes regarding organ donation?

- Yes
- No
- Don't know
